# Supplementary material for: SIRT7-mediated ATM deacetylation is essential for its deactivation and DNA damage repair
Source: PubMed Central journal article supplement — Sci Adv. 2019 Mar 27;5(3):eaav1118. doi: 10.1126/sciadv.aav1118 (PMC6436926; doi:10.1126/sciadv.aav1118), 2019-03-27
Supplement: aav1118_SM.pdf [file aav1118_SM.pdf]

## Supplementary Materials for

### **SIRT7-mediated ATM deacetylation is essential for its deactivation and DNA damage repair**

Ming Tang, Zhiming Li, Chaohua Zhang, Xiaopeng Lu, Bo Tu, Ziyang Cao, Yinglu Li, Yongcan Chen, Lu Jiang, Hui Wang, Lina Wang, Jiadong Wang, Baohua Liu, Xingzhi Xu, Haiying Wang, Wei-Guo Zhu\*

\*Corresponding author. Email: [zhuweigu@szu.edu.cn](mailto:zhuweigu@szu.edu.cn)

Published 27 March 2019, *Sci. Adv.* **5**, eaav1118 (2019)  
DOI: 10.1126/sciadv.aav1118

#### **This PDF file includes:**

- Fig. S1. SIRT7 is recruited onto chromatin upon IR treatment.
- Fig. S2. SIRT7 interacts and deacetylates ATM.
- Fig. S3. Deletion of SIRT7 had no effects on ATR or DNA-PKcs activation.
- Fig. S4. SIRT7 regulates DNA repair and cell survival through ATM deacetylation.

## Supplementary Materials

### Figure S1

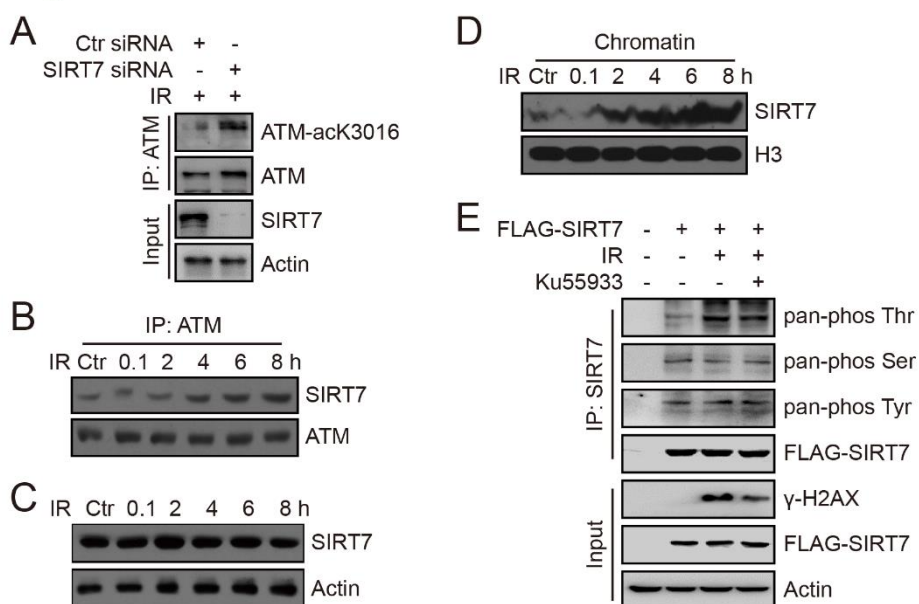

**Fig. S1. SIRT7 is recruited onto chromatin upon IR treatment.** **A.** HCT116 cells were transfected with the indicated siRNAs and treated with IR at 10 Gy and released for 8 h. Whole cell extracts were subjected to IP analysis. **B.** LoVo cells were treated with IR at 10 Gy and released for the indicated time periods. Whole cell extracts were subjected to IP analysis. **C.** HCT116 cells were treated with IR at 10 Gy and released for the indicated time periods. Total cell lysates were subjected to immunoblotting. **D.** LoVo cells were treated with IR at 10 Gy and released for the indicated time periods. Chromatin proteins were subjected to immunoblotting. **E.** HCT116 cells were transfected with the indicated plasmids and treated with IR at 10 Gy and released for 2 h with or without Ku55933 at 10  $\mu$ M. Whole cell extracts were subjected to IP analysis.

Figure S2

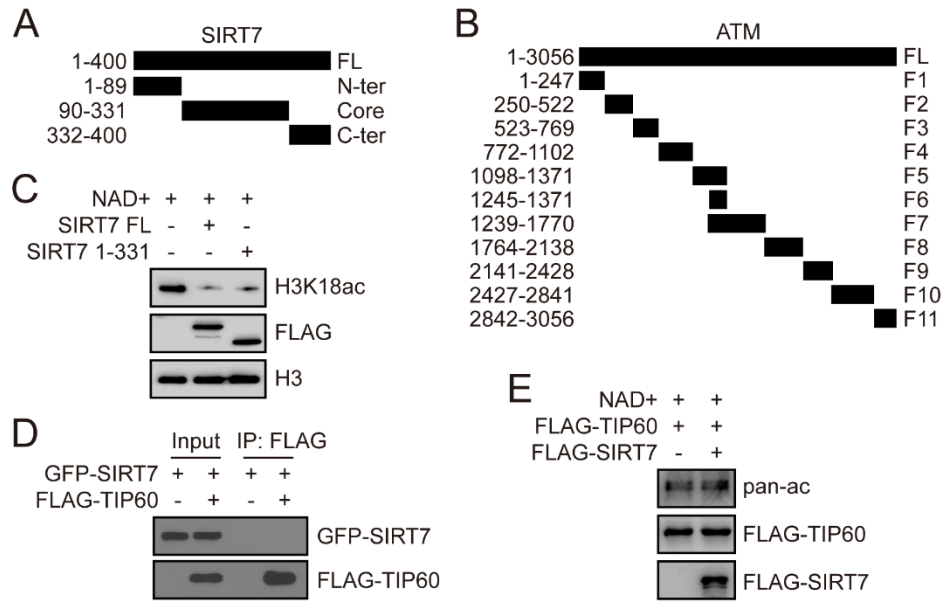

**Fig. S2. SIRT7 interacts and deacetylates ATM.** **A.** Fragments of SIRT7. **B.** Fragments of ATM. **C.** Full-length or 1-331 fragment of SIRT7 were purified and subjected to *in vitro* deacetylation assay using free histones as substrates. **D.** HCT116 cells were transfected with the indicated plasmids and whole cell extracts were subjected to co-IP analysis. **E.** FLAG-TIP60 and FLAG-SIRT7 were separately purified and subjected to *in vitro* deacetylation assay.

Figure S3

A

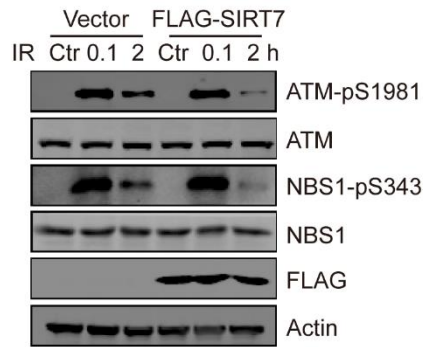

B

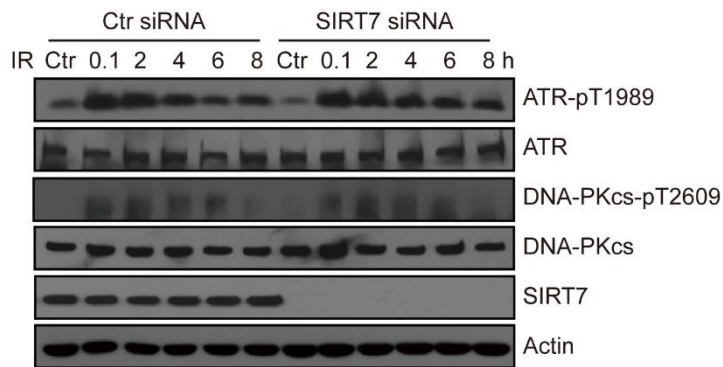

C

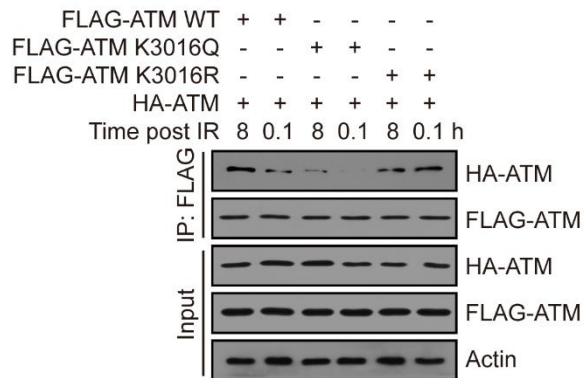

**Fig. S3. Deletion of SIRT7 had no effects on ATR or DNA-PKcs activation.**

**A.** HCT116 cells were transfected with WT SIRT7 or Vector Control and treated with IR at 10 Gy and released for the indicated time periods. Total cell lysates were subjected to immunoblotting. **B.** HCT116 cells were transfected with the indicated siRNAs and treated with IR at 10 Gy and released for the indicated time periods. Total cell lysates were subjected to immunoblotting. **C.** HCT116 cells were transfected with the indicated plasmids and treated with IR at 10 Gy and released for the indicated time periods. Whole cell extracts were subjected to IP analysis.

**Figure S4**

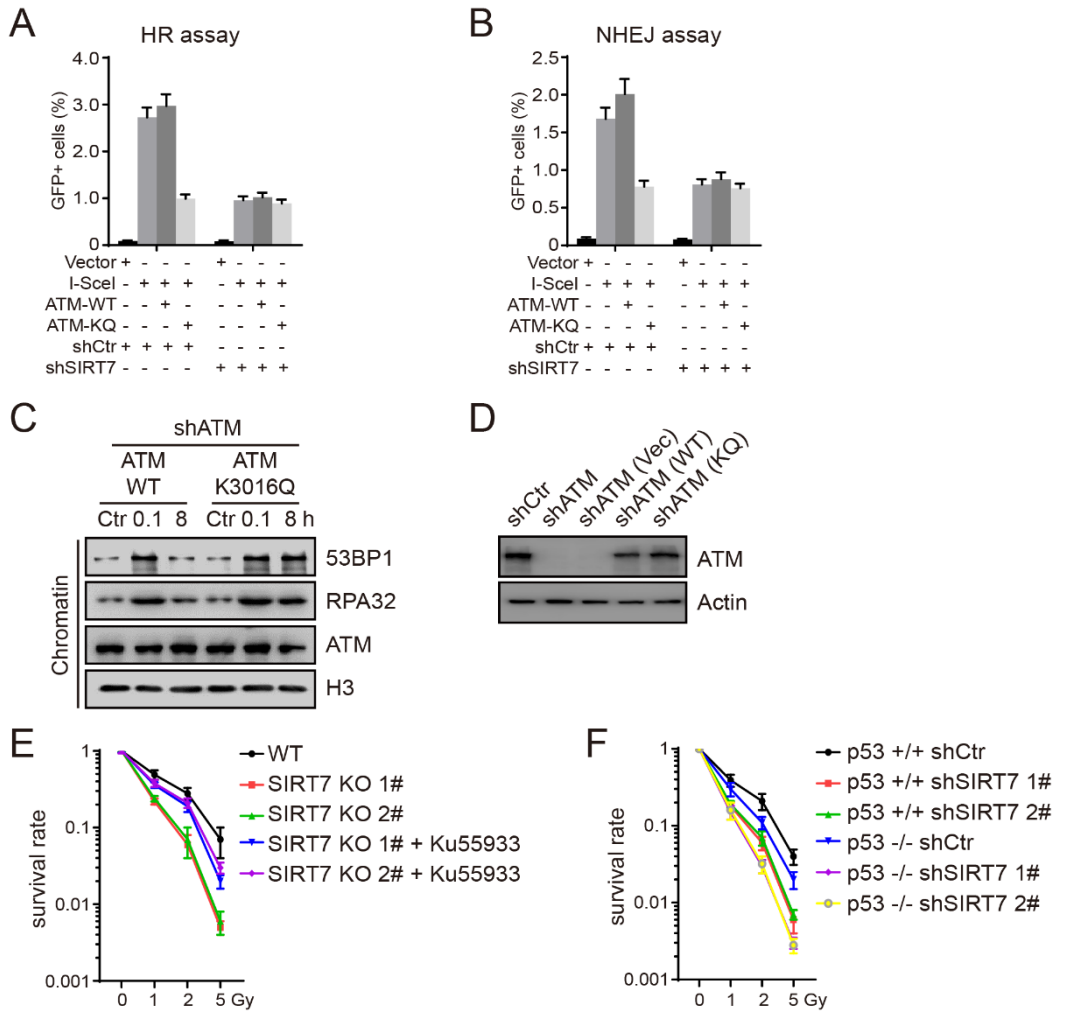

**Fig. S4. SIRT7 regulates DNA repair and cell survival through ATM**

**deacetylation. A, B.** SIRT7 stable knockdown (shSIRT7) or control (shCtr)

DR-U2OS and pEJ5-U2OS cells transfected with the indicated plasmids and

subjected to HR and NHEJ assays, respectively. All data represent the means  $\pm$  SD.

**C.** ATM stable knockdown cells were transfected with the indicated plasmids and subjected to chromatin fractionation after treating with IR at 10 Gy and released for the indicated time. **D.** Immunoblots for protein levels in Fig. 5I. **E.** WT or SIRT7

knockout (1# and 2#) HCT116 cells were subjected to colony formation assay with or without Ku55933 at 10  $\mu$ M. All data represent the means  $\pm$  SD. **F.** SIRT7 stable

knockdown (shSIRT7) or control (shCtr) p53<sup>+/+</sup> or p53<sup>-/-</sup> HCT116 cells were subjected to colony formation assay. All data represent the means  $\pm$  SD.
